# Supplementary material for: Retention in Community Health Screening among Taiwanese Adults: A 9-Year Prospective Cohort Study
Source: MDPI journal article supplement (doi:10.3390/ijerph19116813), 2022-06-02
Supplement: s1 [file s1]

\*\*\*\*\* full GEE model with the control of Mortality and Attrition \*\*\*\*\*

```
GENLIN Participation (REFERENCE=FIRST) BY Gender Smoking Drinking Chewing Exercise Mental
Hypertension Hyperglycemia CHO_G2 Cardiac Stroke Hepatic Cohorts Died Drop_out AGE_G3T1
(ORDER=DESCENDING) WITH Time Edu_Y_Medium
/MODEL Time Gender Edu_Y_Medium Smoking Drinking Chewing Exercise Mental Hypertension
Hyperglycemia CHO_G2 Cardiac Stroke Hepatic Cohorts Died Drop_out AGE_G3T1 INTERCEPT=YES
DISTRIBUTION=BINOMIAL LINK=LOGIT
/CRITERIA METHOD=FISHER(1) SCALE=PEARSON MAXITERATIONS=100 MAXSTEPHALVING=5
PCONVERGE=1E-006(ABSOLUTE) SINGULAR=1E-012 ANALYSISTYPE=3(WALD) CILEVEL=95 LIKELIHOOD=FULL
/EMMEANS SCALE=ORIGINAL
/EMMEANS TABLES=Gender SCALE=ORIGINAL COMPARE=Gender PADJUST=LSD
/EMMEANS TABLES=Smoking SCALE=ORIGINAL COMPARE=Smoking PADJUST=LSD
/EMMEANS TABLES=Drinking SCALE=ORIGINAL COMPARE=Drinking PADJUST=LSD
/EMMEANS TABLES=Chewing SCALE=ORIGINAL COMPARE=Chewing PADJUST=LSD
/EMMEANS TABLES=Exercise SCALE=ORIGINAL COMPARE=Exercise PADJUST=LSD
/EMMEANS TABLES=Mental SCALE=ORIGINAL COMPARE=Mental PADJUST=LSD
/EMMEANS TABLES=Hypertension SCALE=ORIGINAL COMPARE=Hypertension PADJUST=LSD
/EMMEANS TABLES=Hyperglycemia SCALE=ORIGINAL COMPARE=Hyperglycemia PADJUST=LSD
/EMMEANS TABLES=CHO_G2 SCALE=ORIGINAL COMPARE=CHO_G2 PADJUST=LSD
/EMMEANS TABLES=Cardiac SCALE=ORIGINAL COMPARE=Cardiac PADJUST=LSD
/EMMEANS TABLES=Stroke SCALE=ORIGINAL COMPARE=Stroke PADJUST=LSD
/EMMEANS TABLES=Hepatic SCALE=ORIGINAL COMPARE=Hepatic PADJUST=LSD
/EMMEANS TABLES=Cohorts SCALE=ORIGINAL COMPARE=Cohorts PADJUST=LSD
/EMMEANS TABLES=Died SCALE=ORIGINAL COMPARE=Died PADJUST=LSD
/EMMEANS TABLES=Drop_out SCALE=ORIGINAL COMPARE=Drop_out PADJUST=LSD
```

```
/EMMEANS TABLES=AGE_G3T1 SCALE=ORIGINAL COMPARE=AGE_G3T1 PADJUST=LSD
/REPEATED SUBJECT=ID SORT=YES CORRTYPE=AR(1) ADJUSTCORR=YES COVB=ROBUST MAXITERATIONS=100
PCONVERGE=1e-006(ABSOLUTE) UPDATECORR=1
/MISSING CLASSMISSING=EXCLUDE
/PRINT CPS DESCRIPTIVES MODELINFO FIT SUMMARY SOLUTION (EXPONENTIATED).
```

\*\*\*\*\* full GEE model without controlling Mortality and Attrition \*\*\*\*\*

```
GENLIN Participation (REFERENCE=FIRST) BY Gender Smoking Drinking Chewing Exercise Mental
Hypertension Hyperglycemia CHO_G2 Cardiac Stroke Hepatic Cohorts AGE_G3T1
(ORDER=DESCENDING) WITH Time Edu_Y_Medium
/MODEL Time Gender Edu_Y_Medium Smoking Drinking Chewing Exercise Mental Hypertension
Hyperglycemia CHO_G2 Cardiac Stroke Hepatic Cohorts AGE_G3T1 INTERCEPT=YES
DISTRIBUTION=BINOMIAL LINK=LOGIT
/CRITERIA METHOD=FISHER(1) SCALE=PEARSON MAXITERATIONS=100 MAXSTEPHALVING=5
PCONVERGE=1E-006(ABSOLUTE) SINGULAR=1E-012 ANALYSISTYPE=3(WALD) CILEVEL=95 LIKELIHOOD=FULL
/EMMEANS SCALE=ORIGINAL
/EMMEANS TABLES=Gender SCALE=ORIGINAL COMPARE=Gender PADJUST=LSD
/EMMEANS TABLES=Smoking SCALE=ORIGINAL COMPARE=Smoking PADJUST=LSD
/EMMEANS TABLES=Drinking SCALE=ORIGINAL COMPARE=Drinking PADJUST=LSD
/EMMEANS TABLES=Chewing SCALE=ORIGINAL COMPARE=Chewing PADJUST=LSD
/EMMEANS TABLES=Exercise SCALE=ORIGINAL COMPARE=Exercise PADJUST=LSD
```

```
/EMMEANS TABLES=Mental SCALE=ORIGINAL COMPARE=Mental PADJUST=LSD
/EMMEANS TABLES=Hypertension SCALE=ORIGINAL COMPARE=Hypertension PADJUST=LSD
/EMMEANS TABLES=Hyperglycemia SCALE=ORIGINAL COMPARE=Hyperglycemia PADJUST=LSD
/EMMEANS TABLES=CHO_G2 SCALE=ORIGINAL COMPARE=CHO_G2 PADJUST=LSD
/EMMEANS TABLES=Cardiac SCALE=ORIGINAL COMPARE=Cardiac PADJUST=LSD
/EMMEANS TABLES=Stroke SCALE=ORIGINAL COMPARE=Stroke PADJUST=LSD
/EMMEANS TABLES=Hepatic SCALE=ORIGINAL COMPARE=Hepatic PADJUST=LSD
/EMMEANS TABLES=Cohorts SCALE=ORIGINAL COMPARE=Cohorts PADJUST=LSD
/EMMEANS TABLES=AGE_G3T1 SCALE=ORIGINAL COMPARE=AGE_G3T1 PADJUST=LSD
/REPEATED SUBJECT=ID SORT=YES CORRTYPE=AR(1) ADJUSTCORR=YES COVB=ROBUST MAXITERATIONS=100
  PCONVERGE=1e-006(ABSOLUTE) UPDATECORR=1
/MISSING CLASSMISSING=EXCLUDE
/PRINT CPS DESCRIPTIVES MODELINFO FIT SUMMARY SOLUTION (EXPONENTIATED).
```
