# Supplementary material for: Retention in Community Health Screening among Taiwanese Adults: A 9-Year Prospective Cohort Study
Source: MDPI journal article supplement (doi:10.3390/ijerph19116813), 2022-06-02
Supplement: s1 [file s1]

**Supplementary File Table S2.** The comparison among the coefficients of GEE<sup>†</sup> models with or without multiple imputation or control of attrition and mortality

| Covariates                      | Model 1 <sup>‡</sup> | Model 2 <sup>‡</sup> | Model 3 <sup>‡</sup> | Model 4 <sup>‡</sup> |
|---------------------------------|----------------------|----------------------|----------------------|----------------------|
| Intercept                       | 1.995***             | 2.226***             | 1.872***             | 2.105***             |
| Time since enrollment (years)   | -0.346***            | -0.352***            | -0.338***            | -0.345***            |
| Admission cohorts (ref. = 2006) |                      |                      |                      |                      |
| 2007                            | -0.245***            | -0.365***            | -0.238***            | -0.362***            |
| 2008                            | -0.191**             | -0.343***            | -0.171**             | -0.327***            |
| 2009                            | -0.840***            | -0.972***            | -0.820***            | -0.959***            |
| 2010                            | -1.115***            | -1.285***            | -1.093***            | -1.263***            |
| Mortality (yes = 1)             | -1.652***            | -1.770***            |                      |                      |
| Attrition (yes = 1)             | -1.432***            | -1.393***            |                      |                      |
| Gender (male = 1)               | -0.060               | -0.032               | -0.073               | -0.037               |
| Age (ref. = 45-64)              |                      |                      |                      |                      |
| 30-44                           | -0.323***            | -0.300***            | -0.330***            | -0.298***            |
| ≥ 65                            | -0.272***            | -0.246***            | -0.254***            | -0.233***            |
| Education (years)               | 0.040***             | 0.035***             | 0.043***             | 0.037***             |
| Tobacco smoking (yes = 1)       | -0.295***            | -0.342***            | -0.279***            | -0.334***            |
| Alcohol drinking (yes = 1)      | -0.003               | -0.047               | 0.010                | -0.037               |
| Betel-nut chewing (yes = 1)     | -0.355**             | -0.395**             | -0.335**             | -0.390**             |
| Regular exercise (yes = 1)      | 0.182***             | 0.191***             | 0.176***             | 0.189***             |
| Psychiatric disorder (yes = 1)  | -0.138***            | -0.105*              | -0.134***            | -0.097*              |
| Hypertension (yes = 1)          | -0.162***            | -0.169***            | -0.167***            | -0.171***            |
| T2DM (yes = 1)                  | -0.336***            | -0.328***            | -0.336***            | -0.325***            |
| Hyperlipidemia (yes = 1)        | 0.073                | 0.074                | 0.072                | 0.072                |
| Cardiac disease (yes = 1)       | 0.044                | 0.011                | 0.039                | 0.007                |
| Stroke (yes = 1)                | -0.356*              | -0.411*              | -0.325               | -0.381*              |
| Hepatic disease (yes = 1)       | -0.003               | 0.091                | -0.013               | 0.090                |

<sup>†</sup>GEE model with “probability of non-participation” as the reference group. <sup>‡</sup>Model 1 with multiple imputation and control of attrition and mortality, Model 2 without multiple imputation but with control of attrition and mortality, Model 3 with multiple imputation but without control of attrition and mortality, and Model 4 without multiple imputation and control of attrition and mortality. \*  $p < 0.05$ , \*\*  $p < 0.01$ , \*\*\*  $p < 0.001$ . *Abbreviation:* GEE, generalized estimating equation; T2DM, type 2 Diabetes mellitus.
