# Supplementary material for: Retention in Community Health Screening among Taiwanese Adults: A 9-Year Prospective Cohort Study
Source: MDPI journal article supplement (doi:10.3390/ijerph19116813), 2022-06-02
Supplement: s1 [file s1]

**Supplementary File Table S3.** The comparison of covariates at baseline between retention and loss to follow-up subgroups of the LIONS enrollees in Taiwan during 2006-2014

| (N <sub>initial</sub> =5,901)          | Retention<br>(N=5,649) | Loss to follow-up <sup>†</sup><br>(N=252) | <i>p</i> -value |
|----------------------------------------|------------------------|-------------------------------------------|-----------------|
| Covariates                             | Mean±SD or n(%)        | Mean±SD or n(%)                           |                 |
| Gender                                 |                        |                                           |                 |
| Female                                 | 3,090(54.7)            | 132(52.4)                                 | 0.469           |
| Male                                   | 2,559(45.3)            | 120(47.6)                                 |                 |
| Age                                    |                        |                                           |                 |
| 30-44                                  | 1,500(26.6)            | 68(27.0)                                  | 0.699           |
| 45-64                                  | 3,025(53.5)            | 129(51.2)                                 |                 |
| ≥65                                    | 1,124(19.9)            | 55(21.8)                                  |                 |
| Education (years)                      | 8.31±4.64              | 7.52±4.80                                 | 0.011           |
| No schooling                           | 459( 8.2)              | 31(13.0)                                  | 0.034           |
| below Senior high school               | 2,173(39.0)            | 98(41.2)                                  |                 |
| Senior high school                     | 1,709(30.7)            | 65(27.3)                                  |                 |
| Undergraduate or above                 | 1,232(22.1)            | 44(18.5)                                  |                 |
| Marital status                         |                        |                                           |                 |
| Never married                          | 266( 4.9)              | 10( 4.3)                                  | 0.631           |
| Married & living together              | 4,795(89.0)            | 210(90.9)                                 |                 |
| Others                                 | 329( 6.1)              | 11( 4.8)                                  |                 |
| Household income (yearly) <sup>‡</sup> |                        |                                           |                 |
| <NT\$300,000                           | 3,095(63.1)            | 134(63.8)                                 | 0.733           |
| NT\$300,000~750,000                    | 1,332(27.2)            | 53(25.2)                                  |                 |
| >NT\$750,000                           | 475( 9.7)              | 23(11.0)                                  |                 |
| Tobacco smoking                        |                        |                                           |                 |
| Never or ceased                        | 4,436(81.9)            | 190(81.5)                                 | 0.889           |
| Continuously                           | 980(18.1)              | 43(18.5)                                  |                 |
| Alcohol drinking                       |                        |                                           |                 |
| Never or ceased                        | 4,708(87.3)            | 203(87.5)                                 | 0.928           |
| Continuously                           | 685(12.7)              | 29(12.5)                                  |                 |
| Betel-nut chewing                      |                        |                                           |                 |
| Never or ceased                        | 5,234(96.8)            | 224(96.1)                                 | 0.565           |
| Continuously                           | 171( 3.2)              | 9( 3.9)                                   |                 |
| Regular exercise                       |                        |                                           |                 |

|                            |             |            |       |
|----------------------------|-------------|------------|-------|
| No                         | 1,921(35.7) | 88(38.4)   | 0.400 |
| Yes                        | 3,459(64.3) | 141(61.6)  |       |
| BMI                        | 24.50±3.62  | 24.79±3.78 | 0.212 |
| < 24.0                     | 2,664(47.4) | 110(44.0)  | 0.295 |
| ≥ 24.0                     | 2,959(52.6) | 140(56.0)  |       |
| Psychiatric disorder       |             |            |       |
| No                         | 3,908(73.5) | 162(71.7)  | 0.544 |
| Yes                        | 1,409(26.5) | 64(28.3)   |       |
| Hypertension               |             |            |       |
| No                         | 3,553(65.8) | 138(58.7)  | 0.026 |
| Yes                        | 1,847(34.2) | 97(41.3)   |       |
| Diabetes mellitus (type 2) |             |            |       |
| No                         | 4,746(89.9) | 198(87.2)  | 0.192 |
| Yes                        | 533(10.1)   | 29(12.8)   |       |
| Hyperlipidemia             |             |            |       |
| No                         | 3,245(60.7) | 127(54.3)  | 0.051 |
| Yes                        | 2,105(39.3) | 107(45.7)  |       |
| Cardiac disease            |             |            |       |
| No                         | 4,946(94.4) | 206(92.4)  | 0.190 |
| Yes                        | 291( 5.6)   | 17( 7.6)   |       |
| Stroke                     |             |            |       |
| No                         | 5,272(98.8) | 227(99.1)  | 0.506 |
| Yes                        | 62( 1.2)    | 2( 0.9)    |       |
| Hepatic disease            |             |            |       |
| No                         | 4,645(92.8) | 191(91.4)  | 0.458 |
| Yes                        | 363( 7.2)   | 18( 8.6)   |       |

---

<sup>†</sup>Subjects died (i.e., mortality) or dropped out the LIONS (i.e., attrition) after the enrollment. <sup>‡</sup>NT\$ means New Taiwan dollar; currently, 1 US dollar = 29.5 NT dollars.
