# Supplementary material for: Retention in Community Health Screening among Taiwanese Adults: A 9-Year Prospective Cohort Study
Source: MDPI journal article supplement (doi:10.3390/ijerph19116813), 2022-06-02
Supplement: s1 [file s1]

**Supplementary File Table S1.** Missing data of covariates at three follow-up waves<sup>†</sup> in the “Landseed Integrated Outreaching Neighborhood Screening (LIONS)” study, Taiwan 2006-2014

| (N <sub>initial</sub> =5,901)  | 1 <sup>st</sup> follow-up<br>(N=5,834) | 2 <sup>nd</sup> follow-up<br>(N=5,778) | 3 <sup>rd</sup> follow-up<br>(N=5,649) |
|--------------------------------|----------------------------------------|----------------------------------------|----------------------------------------|
| Covariates <sup>†</sup>        | n(%)                                   | n(%)                                   | n(%)                                   |
| Gender                         | 0(0)                                   | 0(0)                                   | 0(0)                                   |
| Age                            | 0(0)                                   | 0(0)                                   | 0(0)                                   |
| Education                      | 79( 1.4)                               | 77( 1.3)                               | 76( 1.3)                               |
| Tobacco smoking                | 241( 4.1)                              | 117( 2.0)                              | 111( 2.0)                              |
| Alcohol drinking               | 265( 4.5)                              | 182( 3.1)                              | 156( 2.8)                              |
| Betel-nut chewing              | 252( 4.3)                              | 124( 2.1)                              | 110( 1.9)                              |
| Regular exercise               | 280( 4.8)                              | 196( 3.4)                              | 133( 2.4)                              |
| Psychiatric disorder           | 345( 5.9)                              | 272( 4.7)                              | 208( 3.7)                              |
| Hypertension                   | 0(0)                                   | 0(0)                                   | 0(0)                                   |
| T2DM                           | 0(0)                                   | 0(0)                                   | 0(0)                                   |
| Hyperlipidemia                 | 8( 0.1)                                | 5( 0.1)                                | 6( 0.1)                                |
| Cardiac disease                | 429( 7.4)                              | 287( 5.0)                              | 178( 3.2)                              |
| Stroke                         | 327( 5.6)                              | 222( 3.8)                              | 146( 2.6)                              |
| Hepatic disease                | 666(11.4)                              | 366( 6.3)                              | 240( 4.2)                              |
| Lost to follow-up <sup>‡</sup> |                                        |                                        |                                        |
| Mortality                      | 20                                     | 33                                     | 64                                     |
| Attrition                      | 47                                     | 90                                     | 188                                    |
| Household income               | 771(13.2)                              | 727(12.6)                              | 566(10.0)                              |
| Marital status                 | 268( 4.6)                              | 152( 2.6)                              | 140( 2.5)                              |

<sup>†</sup>All covariates were measured at the preceding wave with participation, except for lost to follow-up. <sup>‡</sup>Subjects died (i.e., mortality) or dropped out the LIONS (i.e., attrition) after the enrollment. *Abbreviation:* T2DM, type 2 Diabetes mellitus.
