# Supplementary material for: Retention in Community Health Screening among Taiwanese Adults: A 9-Year Prospective Cohort Study
Source: Int J Environ Res Public Health. 2022 Jun 2;19(11):6813. doi: 10.3390/ijerph19116813 (PMC9180367; doi:10.3390/ijerph19116813)
Supplement: Supplementary file 1 [file ijerph-19-06813-s001.zip]

Archive with 4 entries (4 files):
- Supplementary File S4 -- GEE syntax.pdf
- Supplementary File Table S1.pdf
- Supplementary File Table S2.pdf
- Supplementary File Table S3.pdf
